# Supplementary material for: A cobalt-based metal–organic framework electrodeposited on nickel foam as a binder-free electrode for high-performance supercapacitors
Source: Royal Society of Chemistry journal article supplement (doi:10.1039/d2nj01870e), 2022-01-01
Supplement: d2nj01870e1.pdf [file d2nj01870e1.pdf]

## Supplementary Information

### **Cobalt-based metal-organic framework electrodeposited on nickel foam as a binder-free electrode for high-performance supercapacitors**

**Yue Yu,<sup>a</sup> Yan Han,<sup>\*a</sup> Jian Cui,<sup>a</sup> Caiyun Wang<sup>\*b</sup>**

*<sup>a</sup> Energy & Materials Engineering Centre, College of Physics and Materials Science, Tianjin  
Normal University, Tianjin 300387, China*

*<sup>b</sup> Intelligent Polymer Research Institute, University of Wollongong, New South Wales 2500,  
Australia*

## Part I: Supplementary Figures

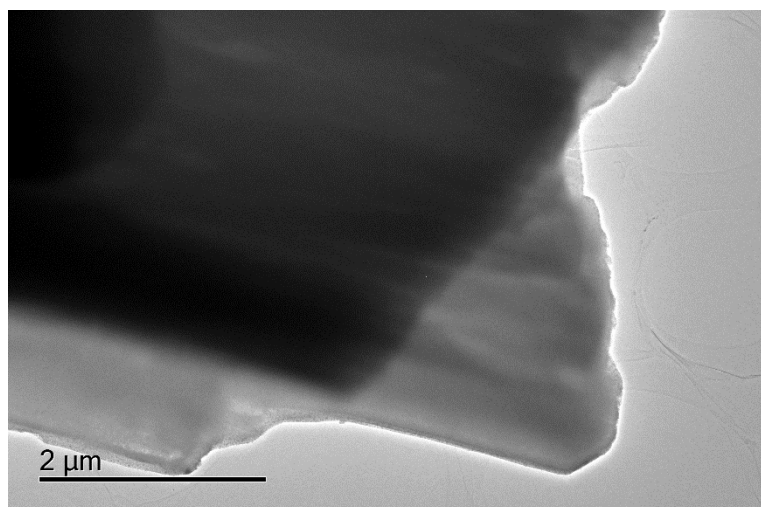

Fig. S1 TEM image of Co-MOF rodlike crystals.

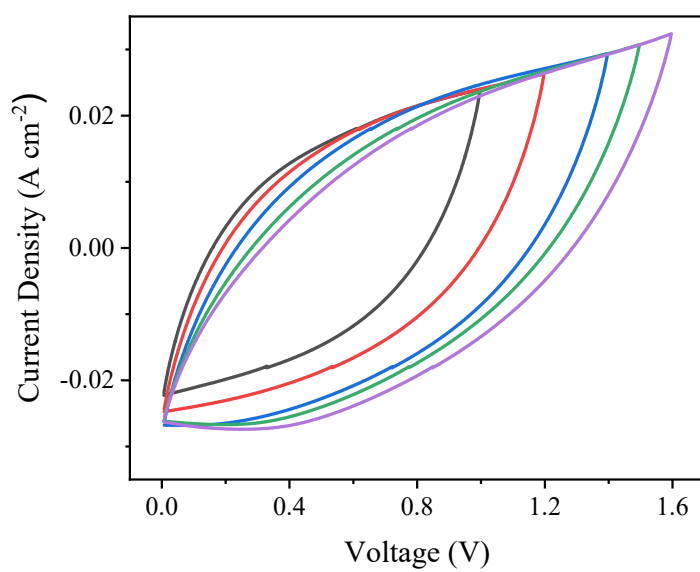

**Fig. S2** CV curves of Co-MOF/NF//AC device collected in different scan potential windows at a scan rate of  $10 \text{ mV s}^{-1}$ .

## Part II: Supplementary Tables

Table S1 The amount of active substance for Co-MOF/NF electrodes deposited for different time.

| Electrodes<br>Active substance | 600 s | 1200 s | 1800 s | 2400 s |
|--------------------------------|-------|--------|--------|--------|
| M/mg cm <sup>-2</sup>          | 5     | 14     | 32     | 40     |

Table S2 Impedance parameters derived using the equivalent circuit model for Co-MOF/NF electrodes deposited for different time.

| Electrodes<br>Parameters | 600 s | 1200 s | 1800 s | 2400 s |
|--------------------------|-------|--------|--------|--------|
| R <sub>s</sub> /Ω        | 0.486 | 0.320  | 0.463  | 0.610  |
| R <sub>ct</sub> /Ω       | 0.058 | 0.110  | 0.161  | 0.100  |
